# Supplementary material for: Equilibrium Studies of Iron (III) Complexes with Either Pyrazine, Quinoxaline, or Phenazine and Their Catecholase Activity in Methanol
Source: MDPI journal article supplement (doi:10.3390/molecules27103257), 2022-05-19
Supplement: s1 [file s1]

MATERIAL SUPPORTING TO

# Equilibrium Studies of Iron(III) Complexes with either Pyrazine, Quinoxaline, or Phenazine and their Catecholase Activity in Methanol

José J. N. Segoviano-Garfias<sup>1\*</sup>, Gabriela A. Zanor<sup>1</sup>, Fidel Ávila-Ramos<sup>1</sup> and Eglá Yareth Bivián-Castro<sup>2</sup>

<sup>1</sup> División de Ciencias de la Vida (DICIVA). Universidad de Guanajuato. Campus Irapuato-Salamanca. Ex Hacienda El Copal, Carretera Irapuato-Silao Km. 9, Irapuato, Gto. 36500 México.

<sup>2</sup> Centro Universitario de los Lagos. Universidad de Guadalajara. Enrique Díaz de León 1144, Col. Paseos de la Montaña 47460, Lagos de Moreno, Jalisco, México

\*Corresponding author:

Tel: +524737405320

E-mail: segovi@ugto.mx

## SUPPORTING INFORMATION FIGURES

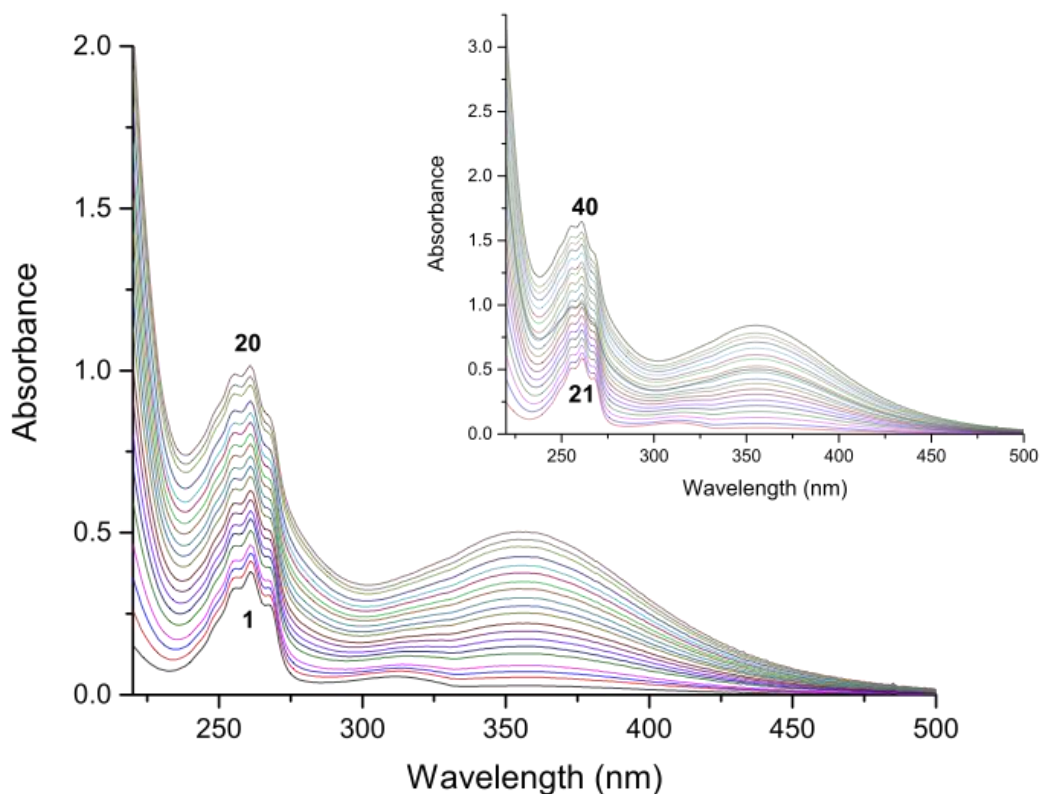

**Figure S1.** Absorption spectra of the iron(III)-pyrazine system in methanol solution: (a) For spectra 1-20, [pyrazine] = 50.0  $\mu\text{M}$  and iron(III) concentration ( $\mu\text{M}$ ): (1) 7.44; (2) 14.9; (3) 22.3; (4) 29.8; (5) 37.2; (6) 44.6; (7) 52.1; (8) 59.5; (9) 67.0; (10) 74.4; (11) 81.8; (12) 89.3; (13) 96.7; (14) 104.0; (15) 112.0; (16) 119.0; (17) 126.0; (18) 134.0; (19) 141.0; (20) 149.0. For spectra 21-40, [pyrazine] = 75.0  $\mu\text{M}$  and iron(III) concentration ( $\mu\text{M}$ ): (21) 11.2; (22) 22.3; (23) 33.5; (24) 44.6; (25) 55.8; (26) 67.0; (27) 78.1; (28) 89.3; (29) 100.0; (30) 112.0; (31) 123.0; (32) 134.0; (33) 145.0; (34) 156.0; (35) 167.0; (36) 179.0; (37) 190.0; (38) 201.0; (39) 212.0; (40) 223.0.

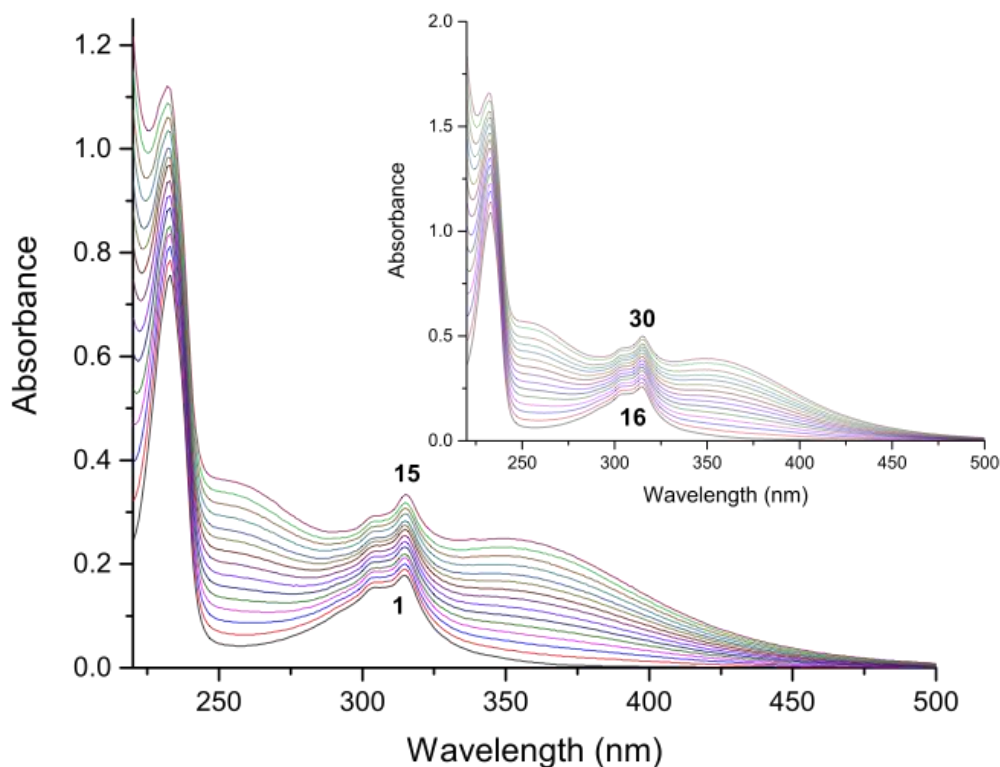

**Figure S2.** Absorption spectra of the iron(III)-quinoxaline system in methanol solution: (a) For spectra 1-15, [pyrazine] = 24.6  $\mu\text{M}$  and iron(III) concentration ( $\mu\text{M}$ ): (1) 2.57; (2) 7.71; (3) 12.9; (4) 18.0; (5) 23.1; (6) 28.3; (7) 33.4; (8) 38.6; (9) 43.7; (10) 48.8; (11) 54.0; (12) 59.1; (13) 64.3; (14) 69.4; (15) 74.5. For spectra 16-30, [quinoxaline] = 36.9  $\mu\text{M}$  and iron(III) concentration ( $\mu\text{M}$ ): (16) 3.96; (17) 11.9; (18) 19.8; (19) 27.7; (20) 35.6; (21) 43.6; (22) 51.5; (23) 59.4; (24) 67.3; (25) 75.2; (26) 83.2; (27) 91.1; (28) 99.0; (29) 107.0; (30) 115.0.

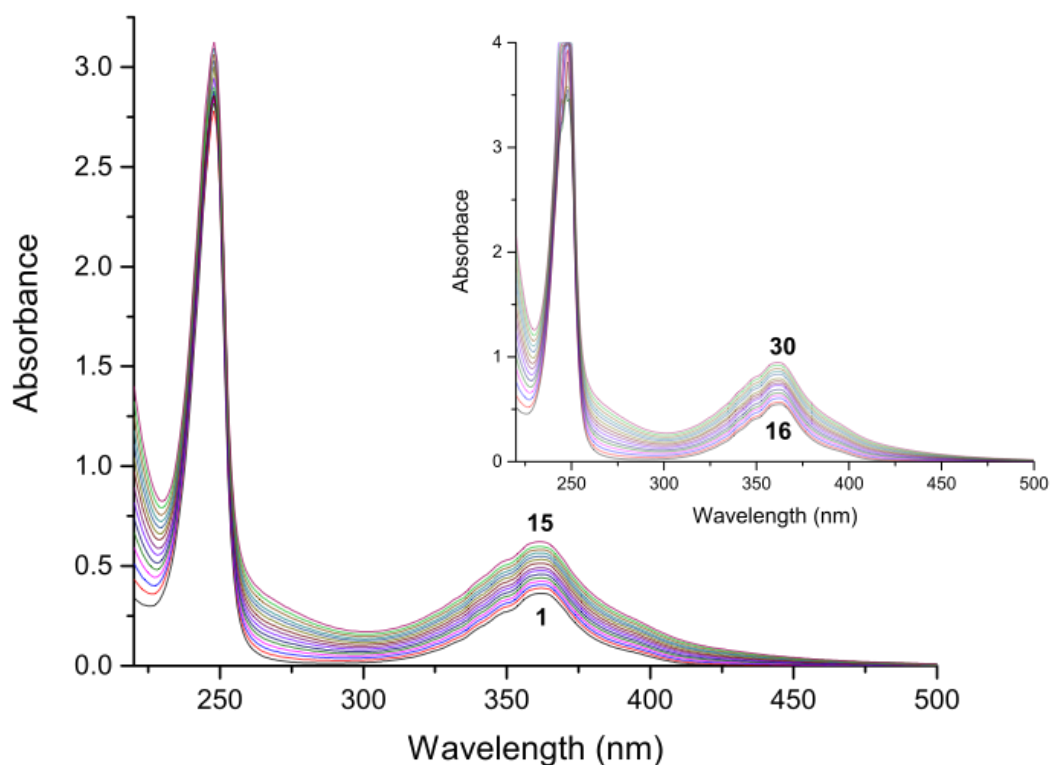

**Figure S3.** Absorption spectra of the iron(III)-phenazine system in methanol solution: (a) For spectra 1-15, [phenazine] = 24.6  $\mu\text{M}$  and iron(III) concentration ( $\mu\text{M}$ ): (1) 2.57; (2) 7.71; (3) 12.9; (4) 18.0; (5) 23.1; (6) 28.3; (7) 33.4; (8) 38.6; (9) 43.7; (10) 48.8; (11) 54.4; (12) 59.1; (13) 64.3; (14) 69.4; (15) 74.5. For spectra 16-30, [phenazine] = 36.9  $\mu\text{M}$  and iron(III) concentration ( $\mu\text{M}$ ): (16) 3.96; (17) 11.9; (18) 19.8; (19) 27.7; (20) 35.6; (21) 43.6; (22) 51.5; (23) 59.4; (24) 67.3; (25) 75.2; (26) 83.2; (27) 91.1; (28) 99.0; (29) 107.0; (30) 115.0.

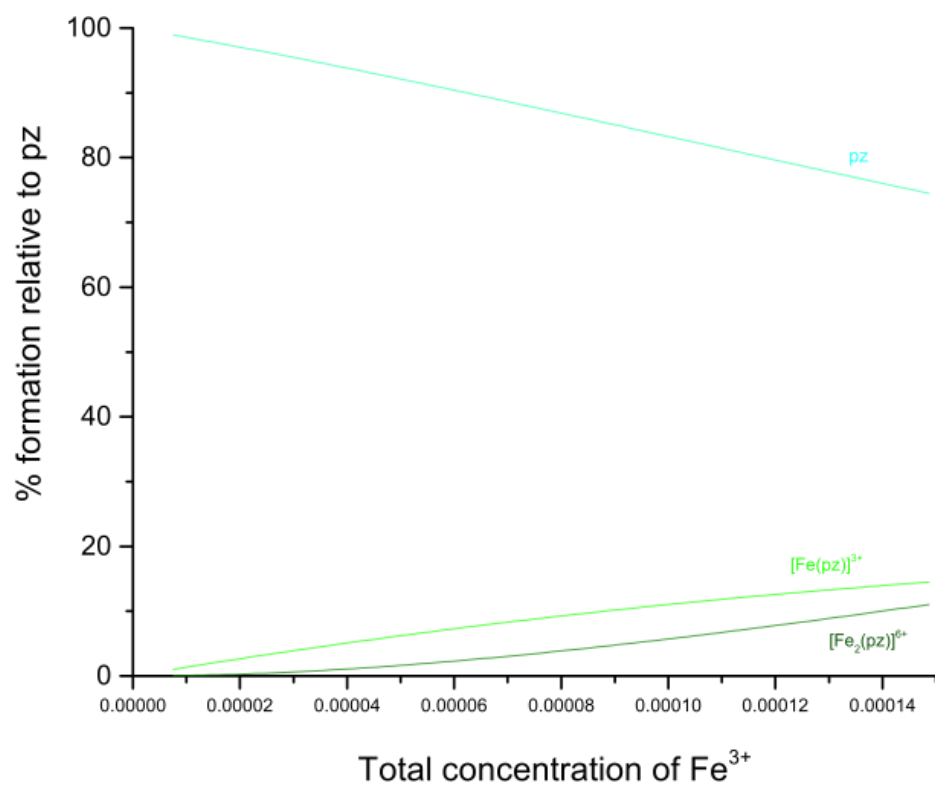

**Figure S4.** Formation curves of the iron(III)-pyrazine complexes in methanol.  $[\text{pz}] = 50 \mu\text{M}$  and  $[\text{Fe}]^{3+}$  range from 7.44 to 148.8  $\mu\text{M}$ .

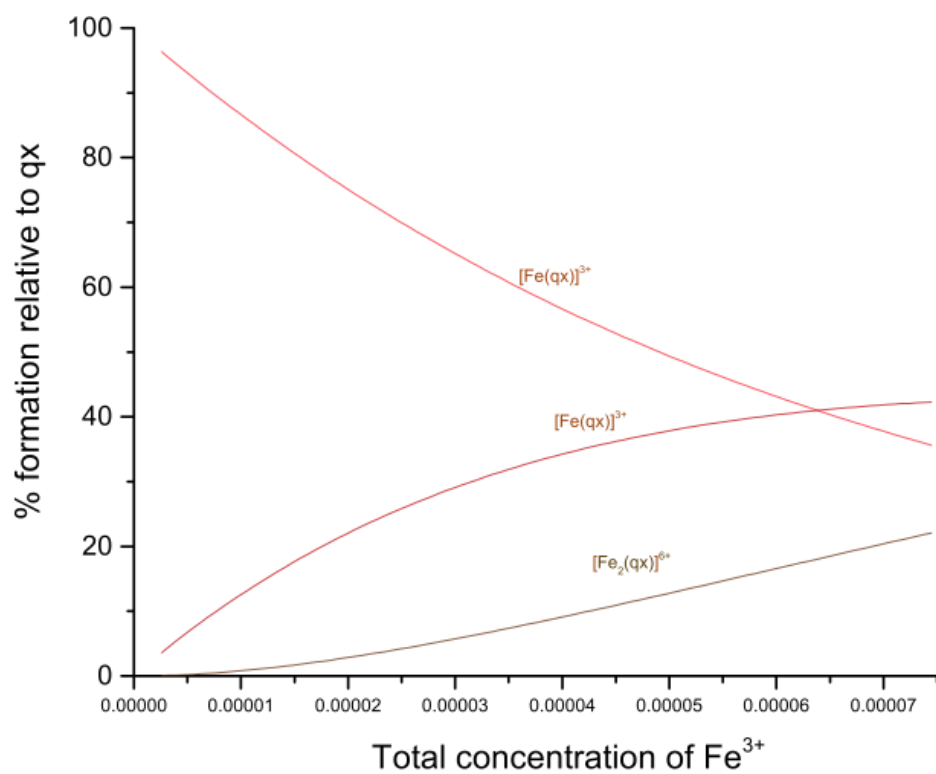

**Figure S5.** Formation curves of the iron(III)-quinoxaline complexes in methanol. [qx]= 24.85  $\mu\text{M}$  and  $[\text{Fe}]^{3+}$  range from 2.57 to 74.53  $\mu\text{M}$ .

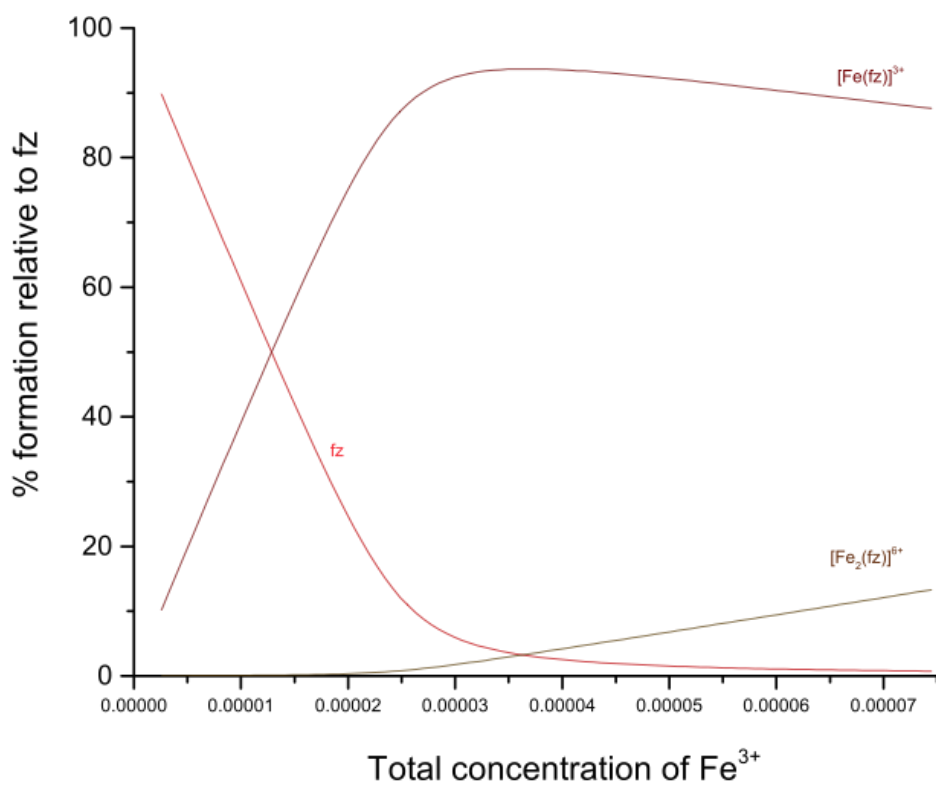

**Figure S6.** Formation curves of the iron(III)-phenazine complexes in methanol. [fz]= 24.85  $\mu$ M and [Fe]<sup>3+</sup> range from 2.57 to 74.53  $\mu$ M.

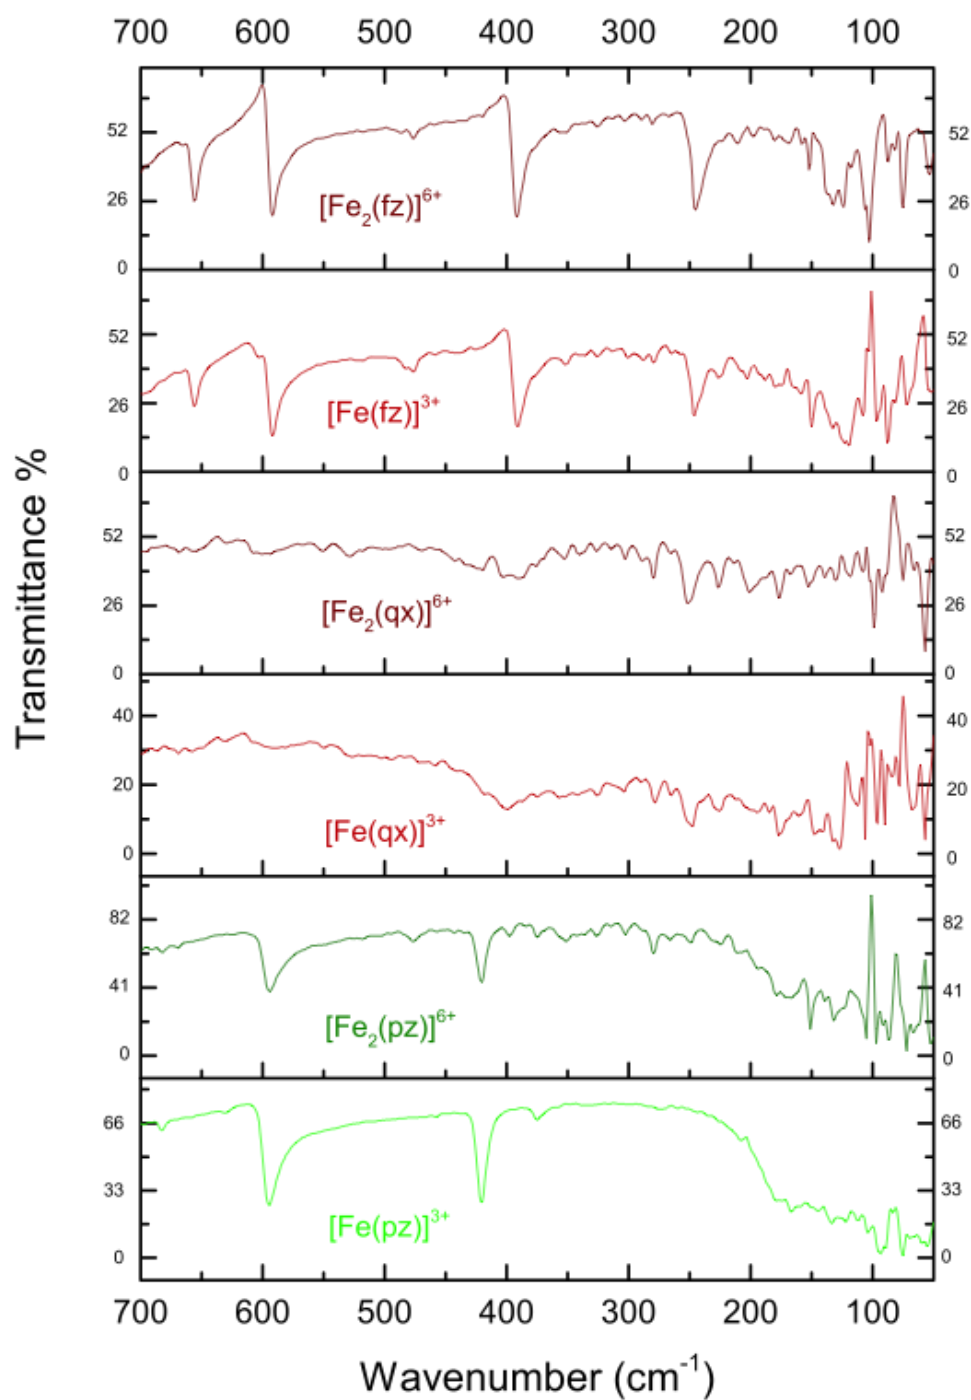

**Figure S7.** Far-infrared spectra of the different iron(III) complexes obtained in this study:  $[\text{Fe}(\text{pz})]^{3+}$ ,  $[\text{Fe}(\text{qx})]^{3+}$ ,  $[\text{Fe}(\text{fz})]^{3+}$ ,  $[\text{Fe}_2(\text{pz})]^{6+}$ ,  $[\text{Fe}_2(\text{qx})]^{6+}$  and  $[\text{Fe}_2(\text{fz})]^{6+}$ .



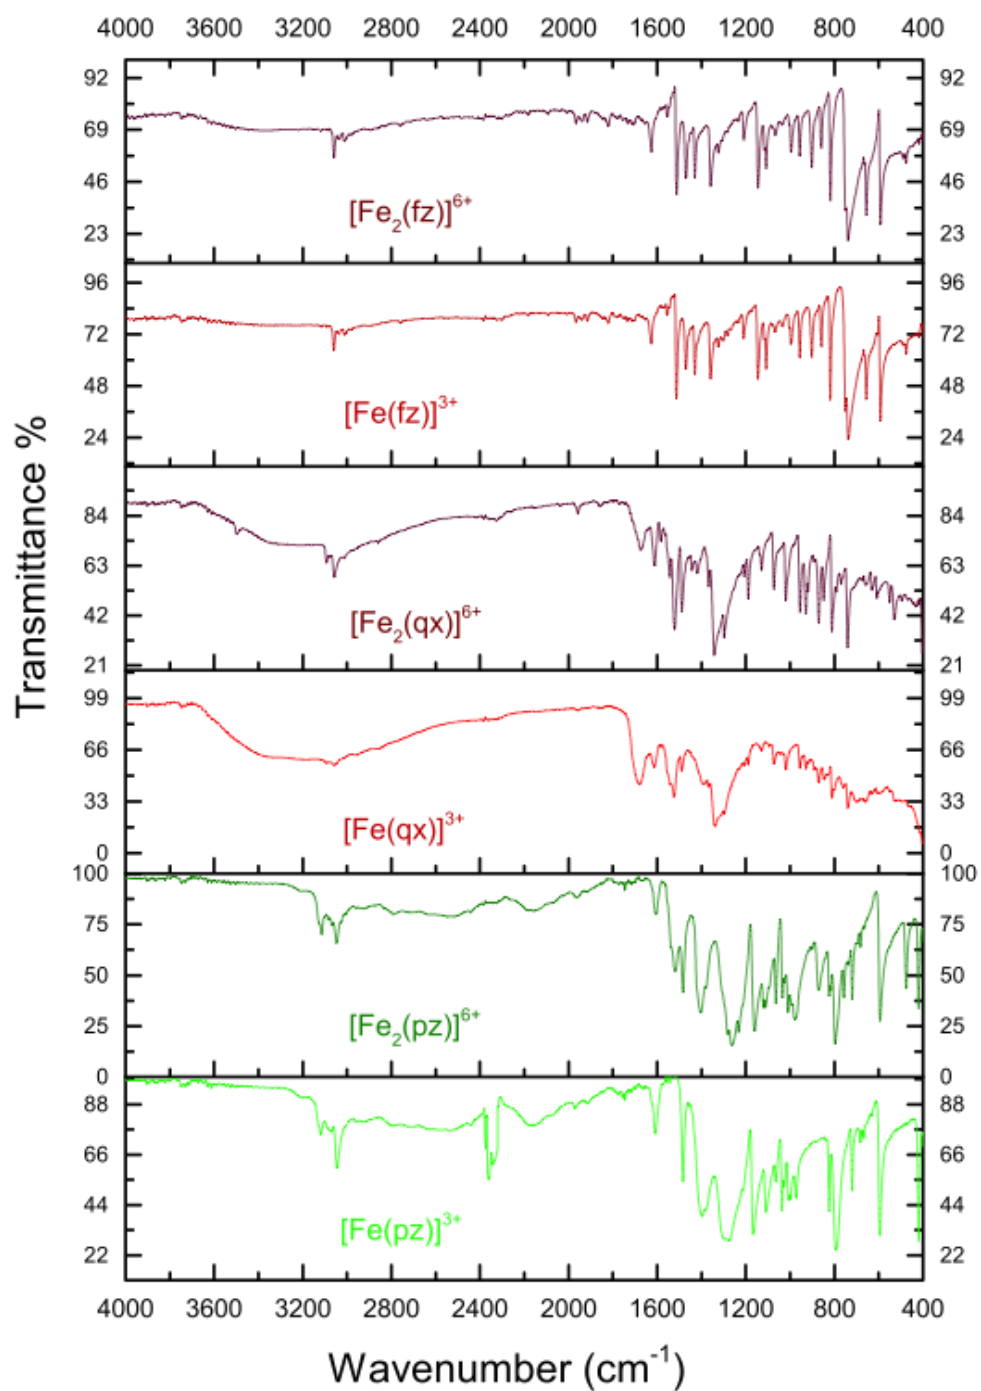

**Figure S8.** Mid-infrared spectra of the different iron(III) complexes obtained in this study: [Fe(pz)]<sup>3+</sup>, [Fe(qx)]<sup>3+</sup>, [Fe(fz)]<sup>3+</sup>, [Fe<sub>2</sub>(pz)]<sup>6+</sup>, [Fe<sub>2</sub>(qx)]<sup>6+</sup> and [Fe<sub>2</sub>(fz)]<sup>6+</sup>.

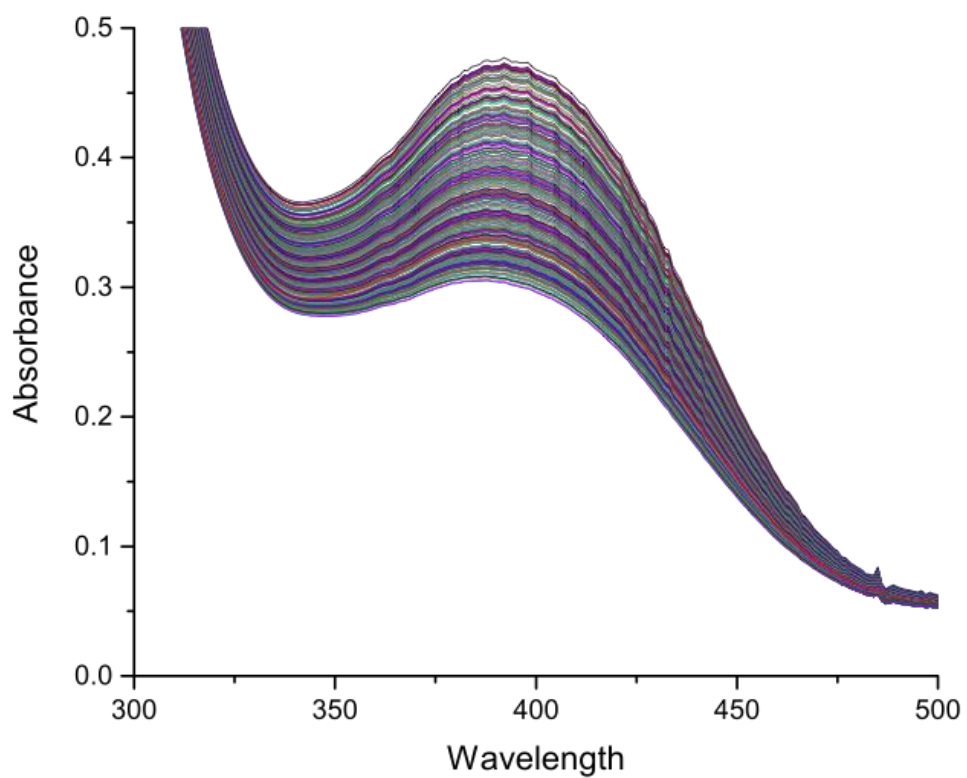

**Figure S9.** Typical oxidation reaction of the 3,5-di-tert-butyl catechol (DTBC) to 3,5-di-tert-butyl-*o*-benzoquinone (DTBQ) monitored at 400 nm.
